# Supplementary material for: A thermosensitive luminescence halloysite-based nanocomposite enabling encryptable thermal printing
Source: Royal Society of Chemistry journal article supplement (doi:10.1039/d4cc00991f), 2024-01-01
Supplement: d4cc00991f1.pdf [file d4cc00991f1.pdf]

## Supporting Information

### Thermosensitive luminescence halloysite-based nanocomposite enabling encryptable thermal printing

Pengying Jia<sup>a,c</sup>, Yelong Lu<sup>\*a</sup>, Yuqing Yang<sup>a</sup>, Xiaoyan Zhu<sup>a</sup>, Hailei Zhang<sup>\*b</sup>, Yonggang Wu<sup>\*a</sup>

<sup>a</sup>College of Chemistry and Materials Science, Hebei University, Baoding, 071002, P. R. China;

<sup>b</sup>Key Laboratory of Medicinal Chemistry and Molecular Diagnosis of Ministry of Education, Hebei University, Baoding, 071002, P. R. China.

<sup>c</sup>College of Physics Science and Technology, Hebei University, Baoding 071002, China.

#### Correspondence

No. 180 Wusi Road, College of Chemistry and Materials Science, Hebei University, Baoding 071002, P. R. China

E-mail: wuyonggang@hbu.edu.cn (W. Y.); 15613663132@163.com (Y. L.).

No. 2666 Qiyi Road, Key Laboratory of Medicinal Chemistry and Molecular Diagnosis of Ministry of Education, Hebei University, Baoding 071000, P. R. China

E-mail: zhanghailei@hbu.edu.cn (H. Z.)

## Experimental

### *Materials*

HNTs were obtained from GuangZhouShinshi Metallurgy and Chemical Company Ltd (Guangzhou, China) and purified according to our previous work<sup>1</sup>. The amino-modified HNTs (HNTs-NH<sub>2</sub>) and HNTs-based photo-initiator (HNTs-I) were also prepared by referring to our previously reported<sup>2</sup>. Organic solvents including ethanol, acetone, and tetrahydrofuran were purchased from Tianjin Kemiou Chemical Reagent Co., Ltd. Distilled water was used throughout the study. High-purity argon was used for degassing procedures. Printing molds were order from Alibaba Co., Ltd.

### *Characterizations*

The morphological characterizations were performed by using a Tecnai G2 F20 S-TWIN transmission electron microscope (TEM) with an accelerating voltage of 200 kV. A JEOL Ltd. Elemental mapping images and high-resolution transmission electron microscopy (HRTEM) images of HNTs-CDs were recorded by using a JEOL JEM-ARM200F model spherical aberration transmission electron microscope.

FTIR spectra were recorded in the region of 400-4000 cm<sup>-1</sup> for each sample on a Thermo Fisher Scientific NICOTET IS10 FTIR spectrophotometer. Samples were previously ground and mixed thoroughly with KBr.

X-ray photoelectron spectroscopy (XPS) was carried out on a Thermo Scientific ESCALab 250Xi using 200 W monochromated Al K $\alpha$  radiation. The 500  $\mu$ m X-ray spot was used for XPS analysis. The base pressure in the analysis chamber was about  $3 \times 10^{-10}$  mbar. Typically, the hydrocarbon C1s line at 284.8 eV from adventitious carbon was used for energy referencing.

TGA was performed on Perkin-Elmer Pyris 6 at a scanning rate of 10°C/min from 40 to 800°C under nitrogen.

X-ray diffraction (XRD) patterns were recorded on a D8 ADVANCE X-ray powder diffractometer system (Bruker Corporation, German) using a tube voltage of 40 kV, a current of 40 mA, a range of 10° to 90° and a step size of 0.06°.

Fluorescence spectra were recorded on a Shimadzu RF-5301PC fluorescence spectrophotometer.

The dynamic light scattering (DLS) measurements were performed by using a commercialized spectrometer from Brookhaven BI-200SM Goniometer equipping a 17 mW He-Ne laser (633 nm). A Laplace inversion program was used to process the data to obtain the effective diameter

### *Synthesis of HNTs-PAM*

Accurately weighed HNTs-I (20 mg) and recrystallized acrylamide (60 mg, 0.85 mmol) were added into 5 mL distilled water in a Schlenk flask. Ultrasound was used to make it well dispersed. Then the system was exposed to 365 nm LED light (Power: 35 W; Intensity: 10<sup>2</sup>mW/cm<sup>2</sup>; Distance: 10 cm) for 30 min. The residue was thoroughly washed with water and then collected by centrifugation. The product HNTs-PAM was obtained after drying in vacuum.

### *Synthesis of HNTs-CDs*

The HNTs-PAM powders were filtered by a 200-mesh sieve. Filtered HNTs-PAM powders were physically mixed with oxalic acid in a mass ratio of 2:1 in a crucible. The mixture was heated at 100 °C for 5 min. Then the mixture was thoroughly washed with water and then dried in vacuum to afford the HNTs-CDs.

### *Preparation of composite films*

The HNTs-PAM powders were filtered by a 200-mesh sieve. Filtered HNTs-PAM powders were physically mixed with oxalic acid in a mass ratio of 2:1 in water. Vigorous stirring was continued to afford a uniform suspension. This suspension was poured onto a glass plate and then spread uniformly via a mild shock by using a shaker rotating with the agitation rate at 100 rpm. The samples were dried at room temperature in a dark environment. The obtained films were stored in a dry box before being used.

### *Stability test*

A WD-2A stability test instrument was used to evaluate the stability of the formed HNTs-CDs (Temperature:  $60 \pm 0.5^\circ\text{C}$ ; Light intensity: 2000 lx, white; Humidity:  $50 \pm 4\%$ ). The samples were placed in the stability test instrument for 7 days to evaluate the stability to heat and light stability. The photoluminescence spectra of the samples on day 0, day 1, day 3, day 5, and day 7 were recorded.

### **Additional data**

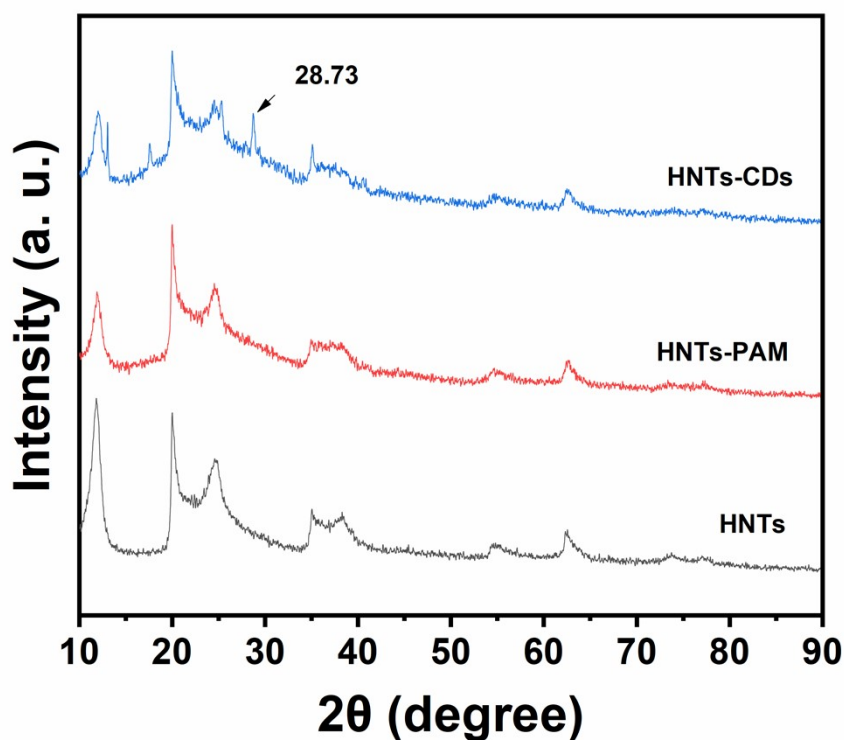

**Figure S1.** XRD patterns of HNTs, HNTs-PAM, and HNTs-CDs.

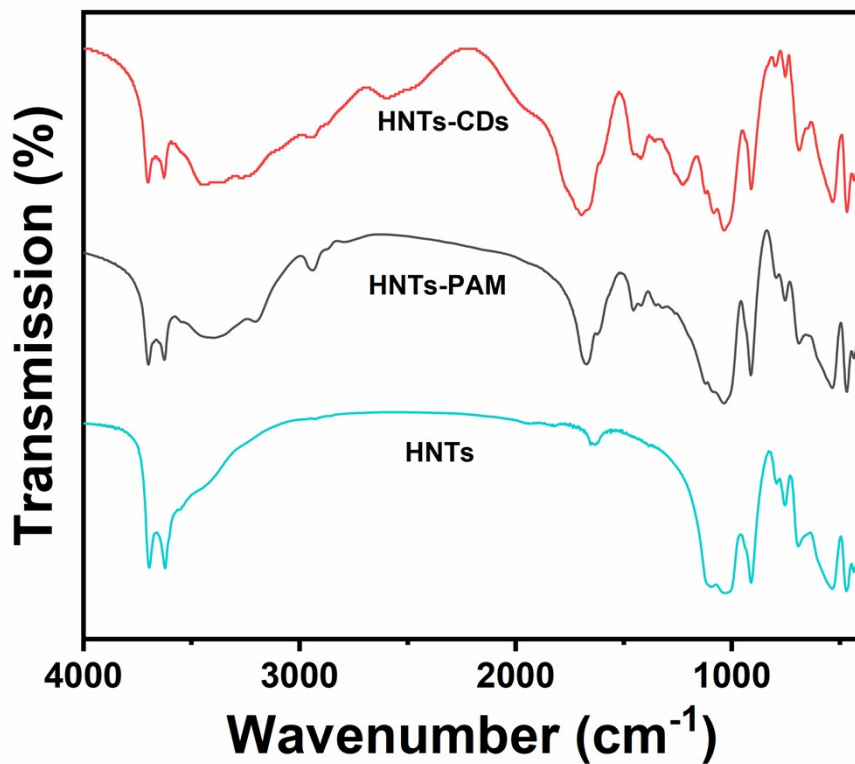

Figure S2. FTIR spectra of HNTs, HNTs-PAM, and HNTs-CDs.

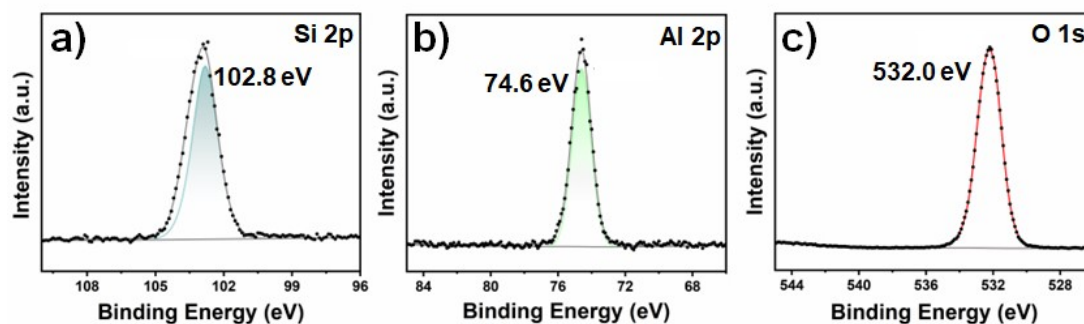

Figure S3. XPS results of HNTs used in this study. a) Si region from the XPS spectrum of HNTs. b) Al region from the XPS spectrum of HNTs. c) O region from the XPS spectrum of HNTs.

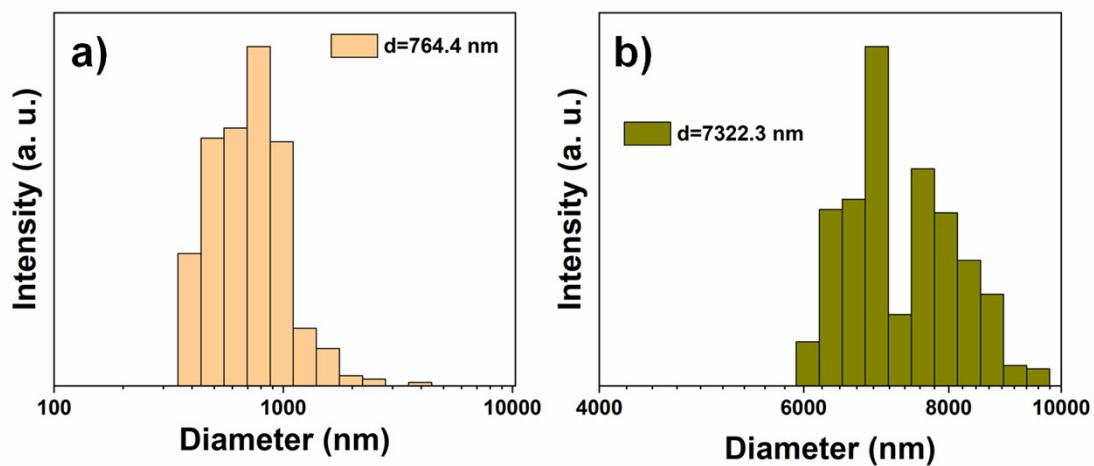

**Figure S4.** DLS diagrams. a) HNTs-PAM. b) HNTs-CD.

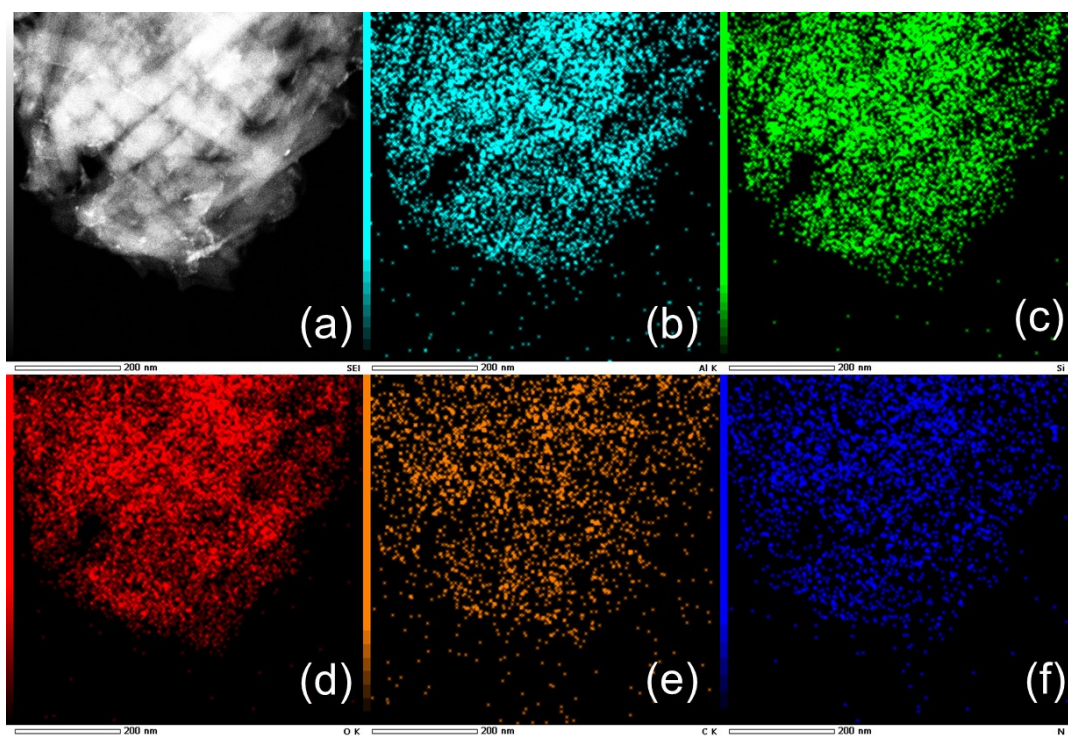

**Figure S5.** Elemental mapping results of the obtained HNTs-CDs. a) High-angle annular dark-field STEM image. b) Al. c) Si. d) O. e) C. f) N.

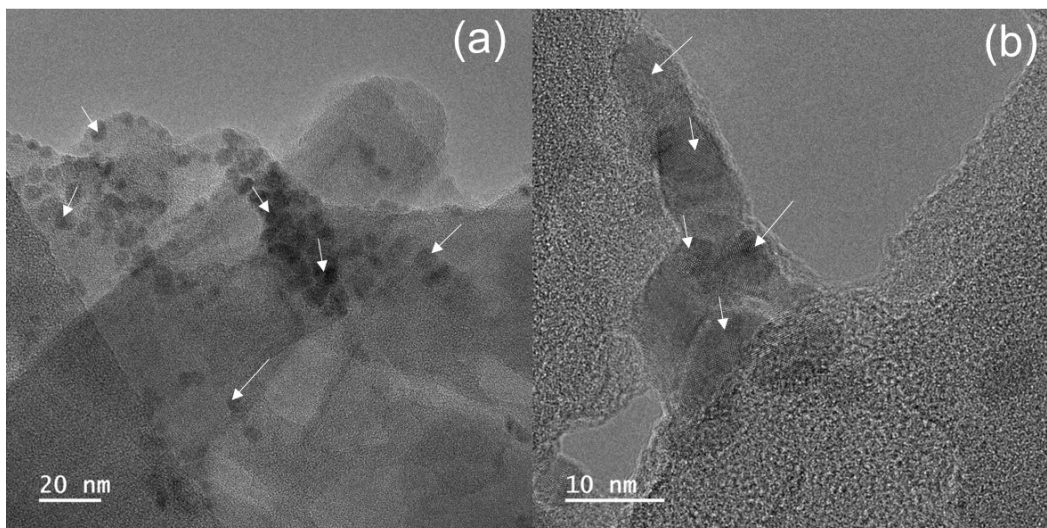

**Figure S6.** High-resolution transmission electron microscopy (HRTEM) images. **a)** bar = 20 nm; **b)** bar = 10 nm.

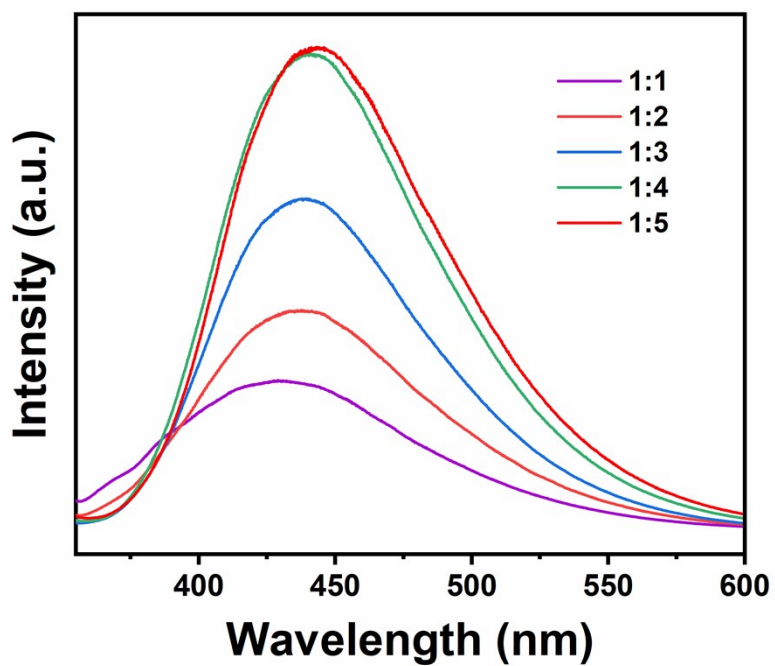

**Figure S7.** Photoluminescence spectra of the mixture of HNTs-PAM and oxalic acid with feed mol. ratio of  $-NH_2/-COOH$  as 1:1, 1:2, 1:3, 1:4, and 1:5.

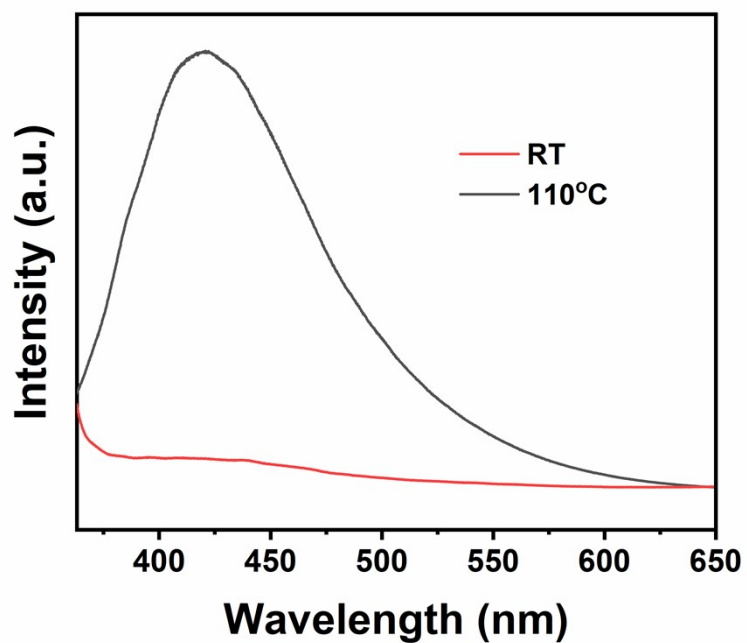

**Figure S8.** Photoluminescence (PL) spectra of the mixture of HNTs-PAM and malic acid at different temperatures.

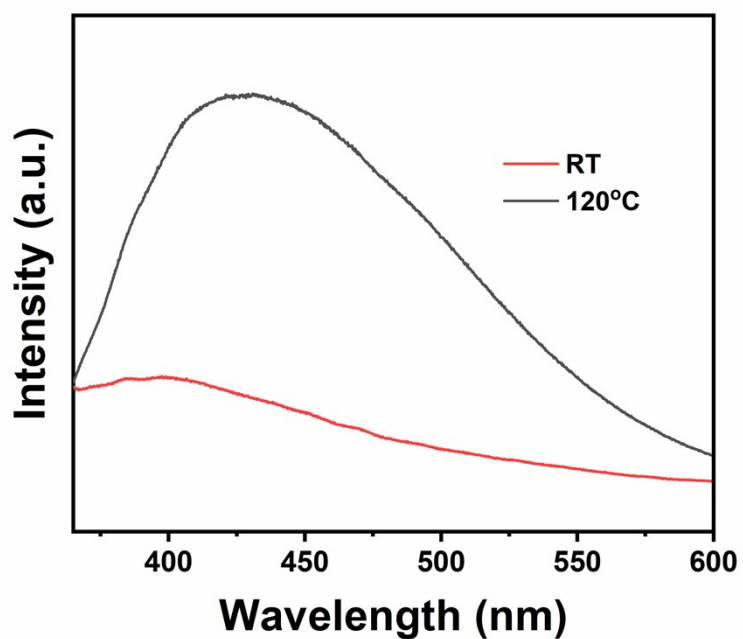

**Figure S9.** Photoluminescence (PL) spectra of the mixture of HNTs-PAM and tartaric acid at different temperatures.

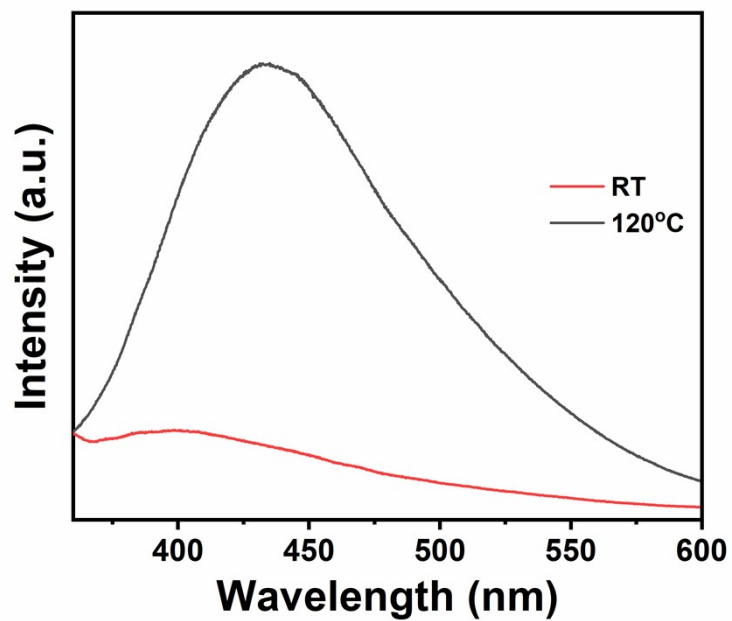

**Figure S10.** Photoluminescence (PL) spectra of the mixture of HNTs-PAM and citric acid at different temperatures.

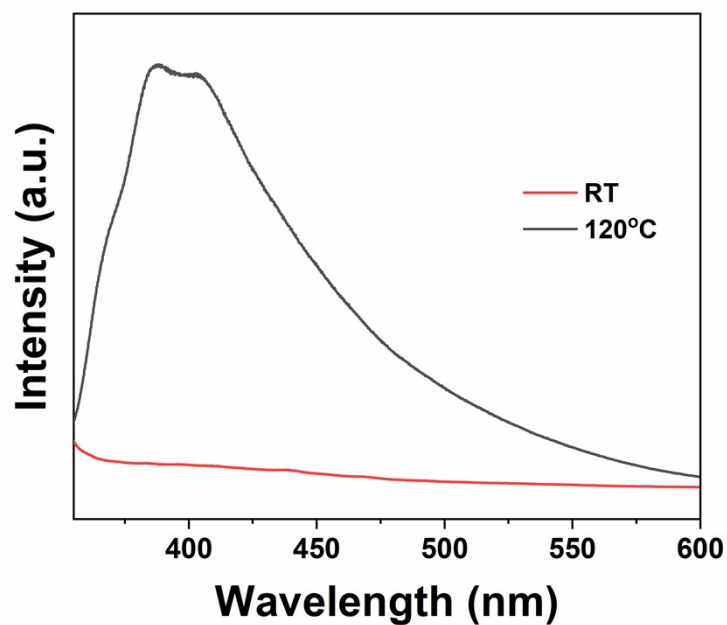

**Figure S11.** Photoluminescence (PL) spectra of the mixture of HNTs-PAM and butanetetracarboxylic acid at different temperatures.



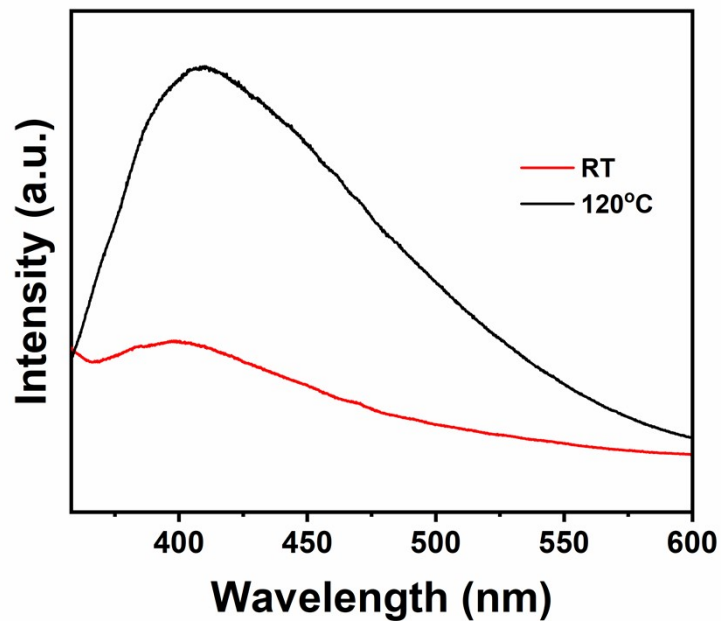

**Figure S12.** Photoluminescence (PL) spectra of the mixture of HNTs-PAM and L- aspartic acid at different temperatures.

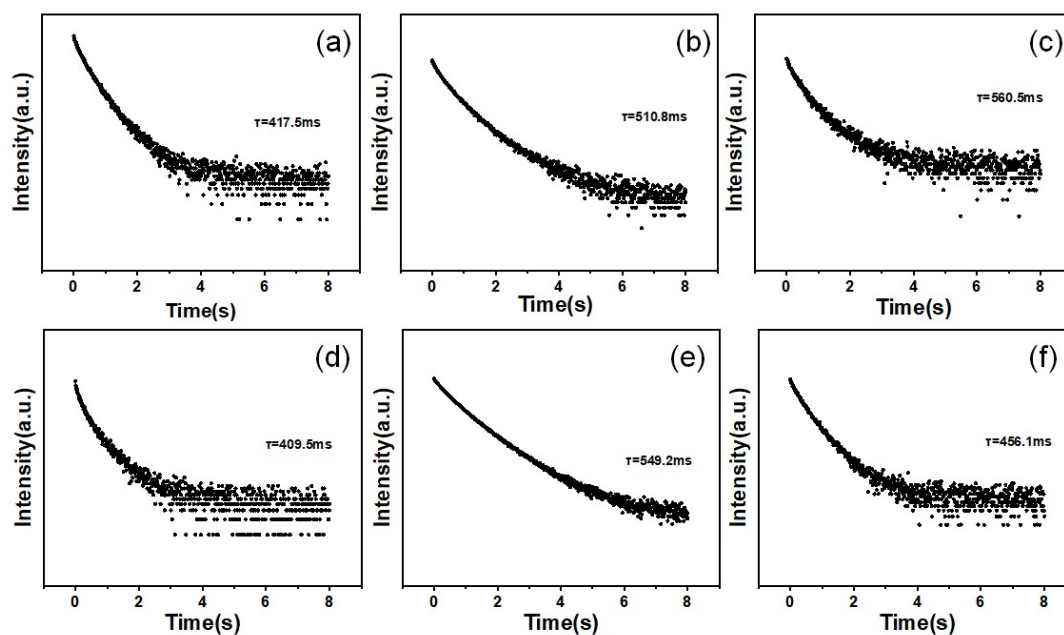

**Figure S13.** Phosphorescence spectra of composites prepared by treating HNTs-PAM with different kinds of polycarboxylic acids. **a)** Oxalic acid. **b)** Malic acid. **c)** Tartaric acid. **d)** Citric acid. **e)** Butanetetracarboxylic acid. **f)** L- aspartic acid.

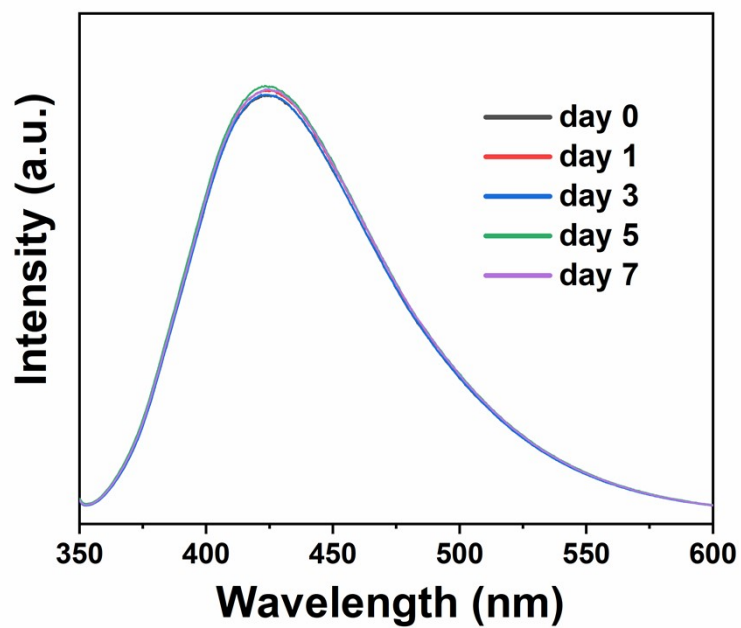

**Figure. S14.** Photoluminescence spectra of the HNTs-CDs in stability test.

## Reference

1. Y. Wang, X. Ba, B. Zhang, Y. Wang, Y. Wu and H. Zhang, *J. Colloid Interface Sci.*, 2024, **657**, 344-351.
2. Y. Lu, H. Zhao, X. Huang, D. Hu, Y. Wu, X. Ba and H. Zhang, *Chem. Commun.*, 2022, **58**, 13636-13639.
